# Supplementary material
Source: PubMed Central journal article supplement (PMC8753198)
Supplement: advancesADV2021006215-suppl1.pdf [file advancesADV2021006215-suppl1.pdf]

## **Appendix 1**

### **Supplementary Methods**

Patient's characteristics were compared using Chi-square test or Fisher's exact test for the categorical data, and t-test or Wilcoxon signed-rank test for continuous data. Factors associated to antibody response after the second vaccine were analyzed by using univariate and multivariate logistic regression models.

Multiple imputations by chained equations (MICE) were performed to account for the missingness in covariates. The number of multiple imputations was set to five with five iterations. Logistic regression analysis was carried out based on the imputed datasets by combining estimates from each completed dataset using Rubin's rules. All tests were two-tailed, and the results were considered statistically significant when  $p < 0.05$ . All analyses were performed using Graphpad prism v9.1.0 for Mac (San Diego, California, USA) aside from ROC analysis and logistic regression which were performed using R statistical software version 3.5.2 (R foundation for Statistical Computing, Vienna, Austria, <http://www.r-project.org/>).

**Supplementary Table 1.** Characteristics of the chronic lymphocytic leukemia patients by vaccination status.

| Characteristics                                           | Serologic results post-vaccination |             |             |             |
|-----------------------------------------------------------|------------------------------------|-------------|-------------|-------------|
|                                                           | Total                              | Post-Dose 1 | Post-Dose 2 | Post-Dose 3 |
| <b>Number of CLL patients</b>                             | 530                                | 158         | 506         | 95          |
| <b>Vaccine type</b>                                       |                                    |             |             |             |
| <b>BNT162b2 - Pfizer BioNTech (%)</b>                     | 377 (71%)                          | 89 (56%)    | 367 (72%)   | 85 (89%)    |
| <b>mRNA-1273 - Moderna (%)</b>                            | 76 (14%)                           | 54 (34%)    | 69 (14%)    | 5 (5%)      |
| <b>BNT162b2 or mRNA-1273 (%)</b>                          | 77 (15%)                           | 15 (10%)    | 70 (14%)    | 5 (5%)      |
| <b>Age at vaccination, median (range)</b>                 | 71 years (37-93)                   |             |             |             |
| <b>Sex</b>                                                |                                    |             |             |             |
| <b>Females (%)</b>                                        | 115 (22%)                          | 31 (20%)    | 114 (23%)   | 24 (25%)    |
| <b>Males (%)</b>                                          | 239 (45%)                          | 79 (50%)    | 231 (46%)   | 65 (68%)    |
| <b>Missing data (%)</b>                                   | 176 (33%)                          | 48(30%)     | 161(31%)    | 6 (6%)      |
| <b>CLL treatment, number of CLL patients (%)</b>          |                                    |             |             |             |
| <b>Treatment-naïve</b>                                    | 218 (40%)                          | 67 (42%)    | 210 (41%)   | 15 (16%)    |
| <b>Prior CLL treatment, currently untreated</b>           | 136 (26%)                          | 36 (23%)    | 130 (26%)   | 17 (18%)    |
| <b>On therapy</b>                                         | 176 (34%)                          | 55 (35%)    | 166 (33%)   | 63 (66%)    |
| <b>BTK inhibitor</b>                                      | 109 (20%)                          | 32 (20%)    | 104 (21%)   | 46 (48%)    |
| <b>Venetoclax</b>                                         | 24 (5%)                            | 9 (6%)      | 23 (5%)     | 2 (2%)      |
| <b>Venetoclax + Anti-CD20 mAb</b>                         | 20 (4%)                            | 4 (3%)      | 19 (4%)     | 8 (8%)      |
| <b>Venetoclax + BTK inhibitor</b>                         | 8 (2%)                             | 5 (3%)      | 6 (1%)      | 4 (4%)      |
| <b>Miscellaneous</b>                                      | 15 (3%)                            | 5 (3%)      | 14 (3%)     | 3 (3%)      |
| <b>Gamma-globulins before vaccination, median (range)</b> | 6.1 g/L (1.2-13.8)                 |             |             |             |

Abbreviations: CLL, chronic lymphocytic leukemia; BTK, Bruton tyrosine kinase; mAb, monoclonal antibody.
